# Supplementary material for: Health system barriers and facilitators to living donor kidney transplantation: a qualitative case study in British Columbia
Source: PubMed Central journal article supplement — CMAJ Open. 2022 Apr 19;10(2):E348–56. doi: 10.9778/cmajo.20210049 (PMC9022938; doi:10.9778/cmajo.20210049), 2022-04-19
Supplement: 2021-0049-2-at.pdf [file 2021-0049-2-at.pdf]

Supplementary Table 1: List of documents reviewed for data collection

| Document Theme                                                                                                     | Document name, name of the organization that created it                                                                               |
|--------------------------------------------------------------------------------------------------------------------|---------------------------------------------------------------------------------------------------------------------------------------|
| <b>Infrastructure</b>                                                                                              | About the BC PRA-BCT Partnership Infographic 2019, BC Transplant                                                                      |
|                                                                                                                    | About Us- PROMIS, BC Renal webpage                                                                                                    |
|                                                                                                                    | BC Transplant Partnership, BC Renal webpage                                                                                           |
|                                                                                                                    | KCC Algorithm – Tasks – Timelines, BC Renal 2017                                                                                      |
| <b>Healthcare professional resources</b>                                                                           | Clinical Guidelines for Living Donor Kidney Transplantation, BC Transplant 2019                                                       |
|                                                                                                                    | Conversations with Patients about Donor Outreach Staff information guide, BC Renal/BC Transplant                                      |
|                                                                                                                    | PROMIS: Professional Resources, BC Renal webpage                                                                                      |
|                                                                                                                    | Solicited Living Donor Process, BC Transplant staff information sheet                                                                 |
| <b>Donor resources</b>                                                                                             | Phases of the Living Kidney Donor Assessment, BC Transplant Centre                                                                    |
|                                                                                                                    | KPD Protocol: Potential Donor 30-day Medical and Social History Questionnaire, BC Transplant Centre                                   |
|                                                                                                                    | Follow-up post-surgery Donor Letter, BC Transplant Centre                                                                             |
|                                                                                                                    | GP post-surgery expectations letter, BC Transplant Centre                                                                             |
|                                                                                                                    | Dialogue on Donating 2009, BC Transplant Centre                                                                                       |
|                                                                                                                    | Transplant Statistics, BC Transplant Centre                                                                                           |
|                                                                                                                    | Letter to Patient for Baseline Work-up, BC Transplant Centre                                                                          |
|                                                                                                                    | Letter to GP for Baseline Work-up, BC Transplant Centre                                                                               |
|                                                                                                                    | LODERP letter for reimbursement, (The Kidney Foundation of Canada, BC and Yukon branch), BC Transplant Centre                         |
|                                                                                                                    | Steps to Prepare Your Body for Surgery (Providence Health Care), BC Transplant Centre                                                 |
|                                                                                                                    | Urology Surgery: Your Guide to Recovery (Providence Health Care), BC Transplant Centre                                                |
|                                                                                                                    | KPD Protocol: Potential Donor Disclosure & Medical & Social History Questionnaire, BC Transplant Centre                               |
|                                                                                                                    | Living Donor Mentor Program Poster, the Kidney Foundation of Canada, BC and Yukon branch                                              |
|                                                                                                                    | LODERP: Frequently Asked Questions, the Kidney Foundation of Canada, BC and Yukon branch                                              |
| <b>Recipient resources</b>                                                                                         | Donor Outreach Letter template 2019, Kidney Care Clinic                                                                               |
|                                                                                                                    | Patient Information: Before and After a Kidney Transplant, Supplied by Kidney Care Clinic (published by Providence Health Care)       |
|                                                                                                                    | Donor Outreach Card, Kidney Care Clinic                                                                                               |
|                                                                                                                    | Kidney Transplant & Finding a Living Donor, Power Point presentation, BC Renal/BC Transplant                                          |
|                                                                                                                    | Finding a Donor, Getting the Word Out: A step by step guide for reaching out to potential donors, BC Transplant                       |
|                                                                                                                    | Patient Teaching Tool: Finding a Donor and Talking about Kidney Donation, BC Renal/BC Transplant [English, Punjabi, Chinese versions] |
|                                                                                                                    | Kidney Paired Exchange Brochure, Supplied by Kidney Care Clinic (published by Canadian Blood Services)                                |
|                                                                                                                    | The Kidney Transplant Process: A step by step guide for kidney transplant recipients, BC Transplant                                   |
|                                                                                                                    | Living with Kidney Transplantation booklet, BC Transplant                                                                             |
| Patient Brochure Legal Loes, Supplied by Kidney Care Clinic (published by Declaration of Istanbul Custodian Group) |                                                                                                                                       |

Supplementary Table 1: List of documents reviewed for data collection

|  |                                                                                        |
|--|----------------------------------------------------------------------------------------|
|  | Travel Assistance Program (TAP BC), Province of British Columbia<br>Government webpage |
|--|----------------------------------------------------------------------------------------|
